# Supplementary material for: El momento de la absorción y compensación de salarios
Source: Springer Nature journal article supplement (doi:10.1007/s10802-018-0464-0), 1986-01-01
Supplement: MOESM2 [file 16040152]

| **Supplemental Table 2.**  SCR during each phase of the fear conditioning task as a function of trauma exposure (n=90) | | | | | | | | | | | | | | | | | | | | |
| --- | --- | --- | --- | --- | --- | --- | --- | --- | --- | --- | --- | --- | --- | --- | --- | --- | --- | --- | --- | --- |
|  | Pre- Conditioning | | | | Early Conditioning | | | | Late Conditioning | | | | Early Extinction | | | | Late Extinction | | | |
|  | CS+ | | CS- | | CS+ | | CS- | | CS+ | | CS- | | CS+ | | CS- | | CS+ | | CS- | |
| SCR | M | (SD) | M | (SD) | M | (SD) | M | (SD) | M | (SD) | M | (SD) | M | (SD) | M | (SD) | M | (SD) | M | (SD) |
|  |  |  |  |  |  |  |  |  |  |  |  |  |  |  |  |  |  |  |  |  |
| Total Sample | .11 | (.16) | .09 | (.15) | .38 | (.46) | .18 | (.37) | .25 | (.32) | .09 | (.12) | .11 | (.18) | .09 | (.14) | .08 | (.15) | .14 | (.32) |
|  |  |  |  |  |  |  |  |  |  |  |  |  |  |  |  |  |  |  |  |  |
| Trauma-Exposed | .11 | (.20) | .08 | (.16) | .23 | (.27) | .20 | (.55) | .17 | (.24) | .08 | (.12) | .10 | (.15) | .09 | (.13) | .09 | (.17) | .11 | (.18) |
|  |  |  |  |  |  |  |  |  |  |  |  |  |  |  |  |  |  |  |  |  |
| Controls | .11 | (.12) | .10 | (.14) | .47 | (.53) | .16 | (.18) | .29 | (.36) | .10 | (.12) | .12 | (.19) | .09 | (.15) | .08 | (.14) | .16 | (.39) |
|  |  |  |  |  |  |  |  |  |  |  |  |  |  |  |  |  |  |  |  |  |

*Note***.** This table is taken from (BLINDED FOR REVIEW, 2016).
